# Supplementary material for: Reproducing the Rift Valley fever virus mosquito-lamb-mosquito transmission cycle
Source: PubMed Central journal article supplement (PMC7809480; doi:10.1038/s41598-020-79267-1), 2021-01-14
Supplement: 41598_2020_79267_MOESM1_ESM.pdf [file 41598_2020_79267_MOESM1_ESM.pdf]

## Supplementary Information

# Reproducing the Rift Valley fever virus mosquito-lamb-mosquito transmission cycle

Paul J Wichgers Schreur <sup>1</sup>, Rianka P. M. Vloet <sup>1</sup>, Jet Kant <sup>1</sup>, Lucien van Keulen <sup>1</sup>,  
Jose L. Gonzales <sup>1</sup>, Tessa M. Visser <sup>2</sup>, Constantianus J.M. Koenraadt <sup>2</sup>, Chantal B.  
F. Vogels <sup>2,ϕ</sup>, and Jeroen Kortekaas <sup>1,3\*</sup>

<sup>1</sup> Wageningen Bioveterinary Research, Lelystad, The Netherlands

<sup>2</sup> Laboratory of Entomology, Wageningen University & Research, Wageningen, The Netherlands.

<sup>3</sup> Laboratory of Virology, Wageningen University & Research, Wageningen, The Netherlands

<sup>ϕ</sup> Present address: Department of Epidemiology of Microbial Diseases, Yale School of Public Health, New Haven, CT, USA

\*Correspondence: jeroen.kortekaas@wur.nl; Tel.: +31 6 20919110

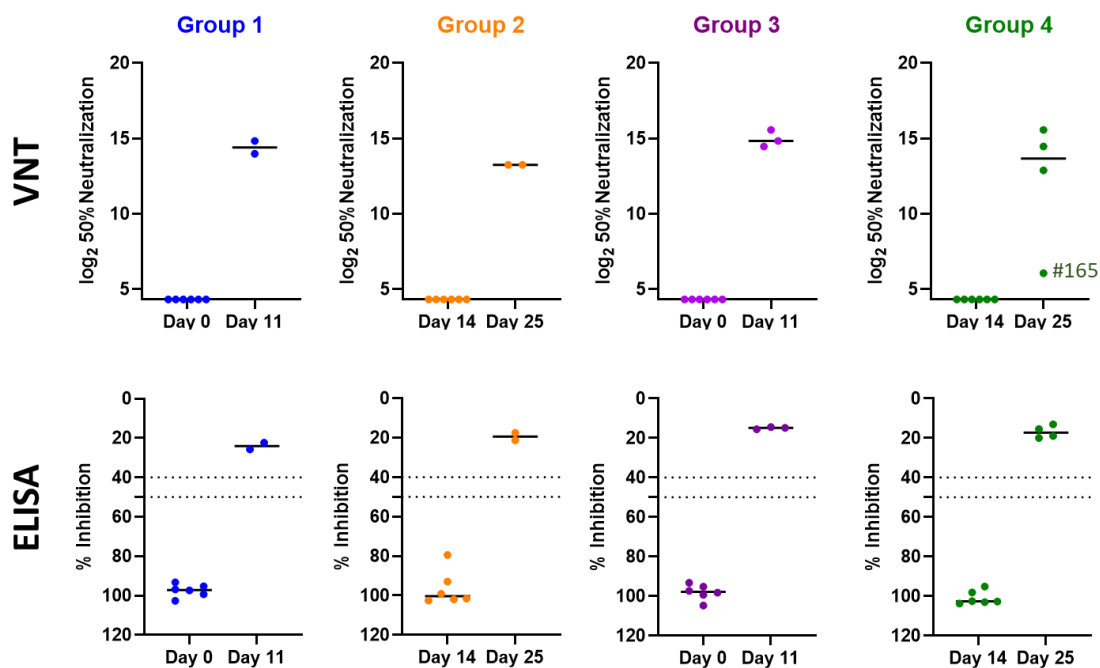

**Supplementary Figure S1. Antibody responses after RVFV infection following needle inoculation or exposure to RVFV-positive mosquitoes.** Sera collected from lambs before IV inoculation or mosquito exposure (day 0 for Groups 1 and 3; day 14 for Groups 2 and 4) and 11 days after infection via needle inoculation (Group 1) or mosquito exposure (Groups 2, 3, 4) were analyzed for the presence of anti-nucleocapsid (N) antibodies by the ID Screen® Rift Valley Fever Competition Multi-species ELISA (ID-VET) and neutralizing antibodies by virus-neutralization test<sup>26</sup>.

**Supplementary Table S1: Experimental details**

| Animals                      |                                                                                                                                                                                |
|------------------------------|--------------------------------------------------------------------------------------------------------------------------------------------------------------------------------|
| Species                      | Sheep                                                                                                                                                                          |
| Breed and/or strain          | Texel cross-breed                                                                                                                                                              |
| Source                       | Conventional sheep farm Netherlands                                                                                                                                            |
| Sex                          | Male and female                                                                                                                                                                |
| Developmental stage          | Between 8-16 weeks of age                                                                                                                                                      |
| Health status                | Healthy upon enrolment                                                                                                                                                         |
| Weight                       | 12-30 kg                                                                                                                                                                       |
| Identification               | By ear tag and by non-irritating coloured spray on the back of the animal                                                                                                      |
| Housing and Husbandry        |                                                                                                                                                                                |
| Type of facility             | BSL-3 facility                                                                                                                                                                 |
| Type of housing              | Stables (18 m <sup>2</sup> )                                                                                                                                                   |
| Bedding material             | Wood shavings                                                                                                                                                                  |
| Number of animals per stable | 12                                                                                                                                                                             |
| Light/dark cycle             | 12/12                                                                                                                                                                          |
| Temperature                  | 20°C                                                                                                                                                                           |
| Quality of water             | Tap water, quality checked daily                                                                                                                                               |
| Type of food                 | Hay, grass pellets and sheep grain                                                                                                                                             |
| Access to water and food     | <i>Ad libitum</i>                                                                                                                                                              |
| Access to food               | Once per day                                                                                                                                                                   |
| Environmental enrichment     | None                                                                                                                                                                           |
| Acclimatization time         | 7 days                                                                                                                                                                         |
| Experimental Procedure       |                                                                                                                                                                                |
| Number experimental groups   | 4                                                                                                                                                                              |
| Number of animals per group  | 6                                                                                                                                                                              |
| Randomisation procedure      | Animals were randomly allocated to groups by a veterinarian.                                                                                                                   |
| Experimental unit            | Group                                                                                                                                                                          |
| Route of administration      | Intramuscular injection in jugular vein or exposure to mosquitoes in cardboard containers.                                                                                     |
| Anaesthesia and analgesia    | Sedator and atipamezol                                                                                                                                                         |
| Method of euthanasia         | Intravenous injection with sodium pentobarbital.                                                                                                                               |
| Humane endpoints             | -The animal is recumbent and does not rise even after stimulation<br>-The animal is unable to drink<br>-The animal is lethargic (listless, apathic, non-responsive to stimuli) |
| Observations                 | The animals were observed for clinical signs once per day before, and twice per day after inoculation or mosquito exposure.                                                    |

**Supplementary Table S2. Mean and peak viremia measured in RVFV infected lambs<sup>a</sup>**

| Group | Area Under the Curve (AUC) |      | Peak viremia |      |
|-------|----------------------------|------|--------------|------|
|       | Mean                       | SD   | Mean         | SD   |
| 1     | 6.28                       | 0.52 | 6.21         | 0.53 |
| 2     | 6.41                       | 0.30 | 6.33         | 0.32 |
| 3     | 5.53                       | 1.40 | 5.47         | 1.52 |
| 4     | 5.71                       | 1.97 | 5.59         | 2.02 |

<sup>a</sup>Numbers represent TCID<sub>50</sub>/ml.
